# Supplementary material for: Immobilization of Recombinant Endoglucanase (CelA) from Clostridium thermocellum on Modified Regenerated Cellulose Membrane
Source: MDPI journal article supplement (doi:10.3390/catal12111356), 2022-11-03
Supplement: s1 [file s1]

# Immobilization of Recombinant Endoglucanase (CelA) from *Clostridium thermocellum* on Modified Regenerated Cellulose Membrane

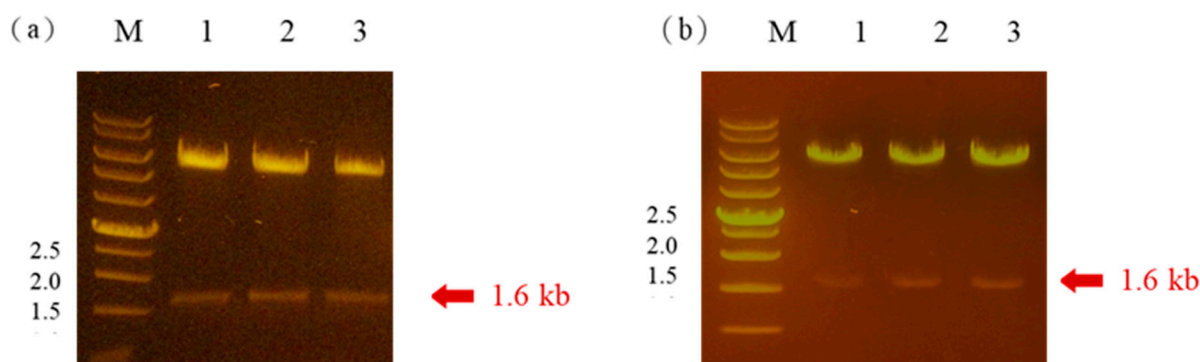

**Figure S1.** DNA electropherogram of pET21b-CelA-his plasmid in *E. coli* BL21 (a) and *E. coli* ER2566 (b) confirmed by gene cleavage. Lane M: 1 Kb marker; Lane 1-3: CelA digested with Nde I and Xho I

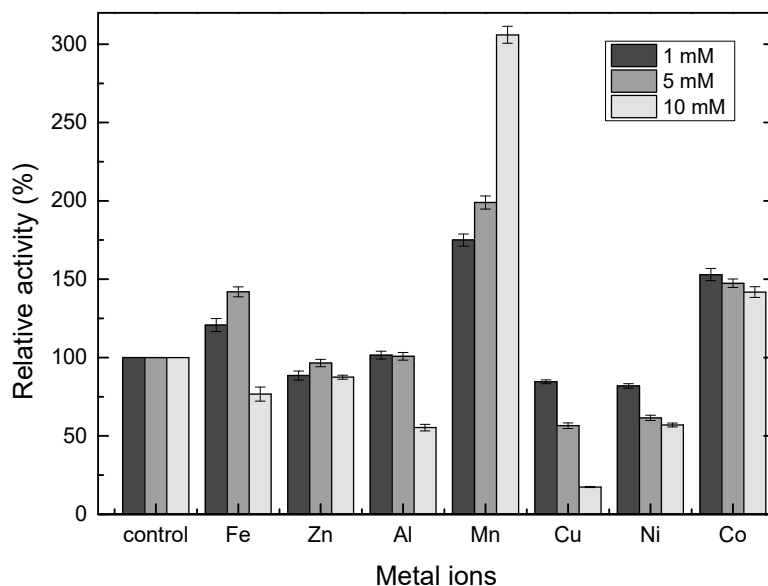

**Figure S2.** Effects of different metal ions on the activity of CelA endoglucanase enzyme.

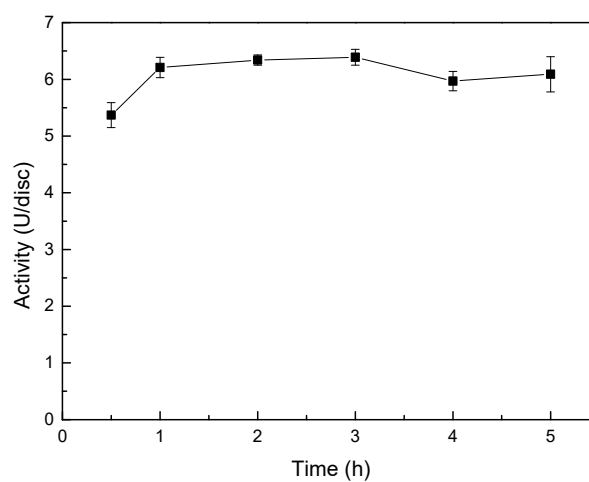

**Figure S3.** Effect of GA treatment time on CelA endoglucanase activity.

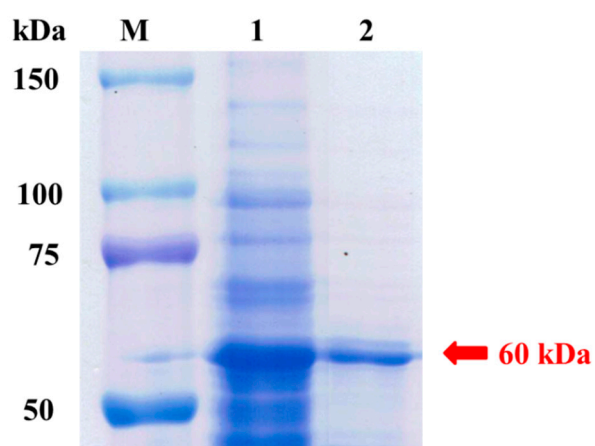

**Figure S4.** SDS PAGE electrophoresis of the Histag purified CelA. Lane M: marker (kDa); Lane 2: crude CelA; Lane 3: purified CelA.

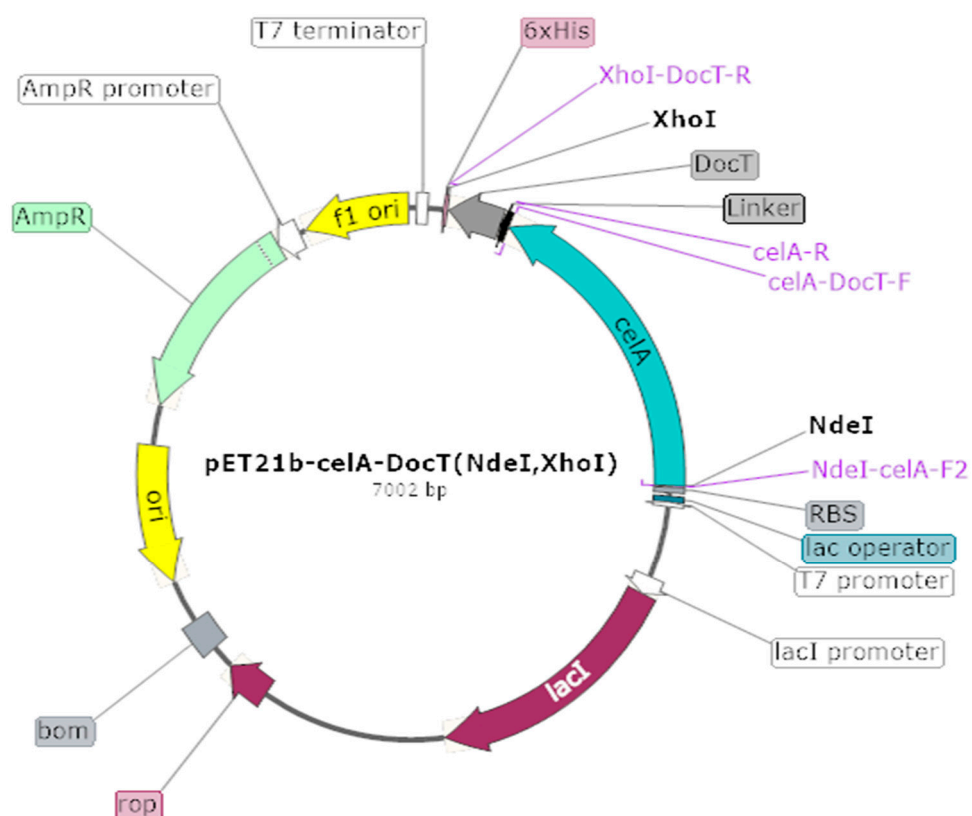

Figure S5. pET21b-CelA-docT gene construction.

(a)

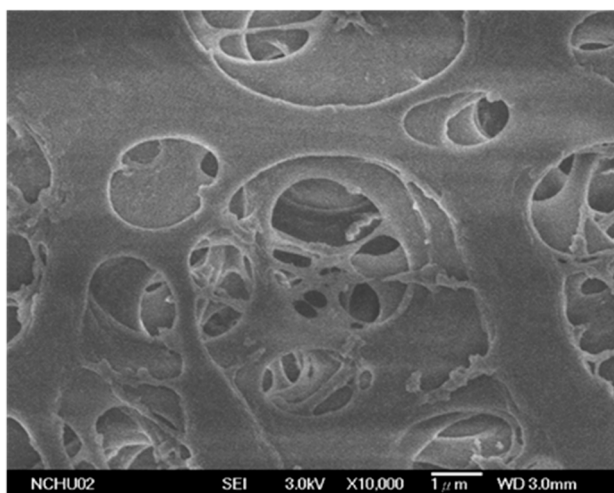

(b)

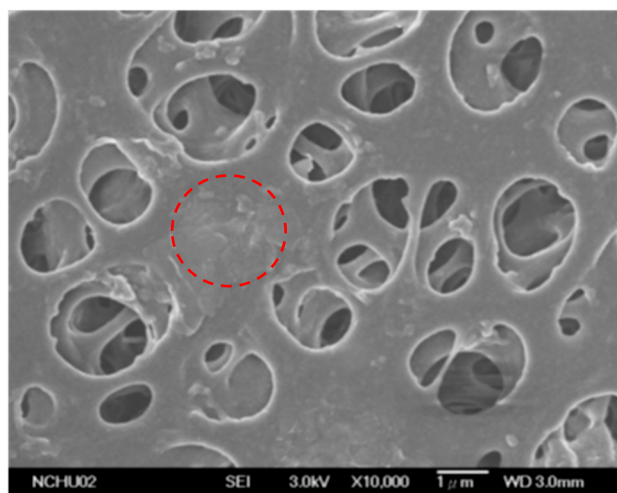

Figure S6. SEM micrographs of IMAM RC membrane (a) before (b) after immobilization

**Table S1.** *Escherichia coli* strains and plasmids used in the study.

| Strain or plasmid | Genotype and Relevant characteristics                                                                                                                                                                                                        | Source                                                       |
|-------------------|----------------------------------------------------------------------------------------------------------------------------------------------------------------------------------------------------------------------------------------------|--------------------------------------------------------------|
| DH5 $\alpha$      | F- endA1 glnV44 thi-1 recA1 relA1 gyrA96 deoR nupG $\Phi$ 80dlacZ $\Delta$ M15 $\Delta$ (lacZYA-argF)U169, hsdR17(rK- mK+) $\lambda$ -                                                                                                       | Novagen, USA                                                 |
| BL21 (DE3)        | F- ompT gal dcm lon hsdSB(rB- mB-) $\lambda$ -(DE3 [lacI lacUV5-T7 gene 1 ind 1 sam7 nin5])                                                                                                                                                  | Novagen, USA                                                 |
| ER 2566           | F- $\lambda$ - fhuA2 [lon] ompT lacZ::T7 gene 1 gal sulA 11 $\Delta$ (mcrC-mrr)114::IS10R(mcr-73::miniTn10-TetS)2 R(zgb-210::Tn10)(TetS)endA1 [dcm]                                                                                          | New England Biolabs, USA                                     |
| pET21b            | Bacterial vector for inducible expression of N-terminally T7-tagged proteins                                                                                                                                                                 | Novagen, USA                                                 |
| celA              | Hydrolyze internal glycosidic bonds in cellulose, generally have 'cleft'-like active sites, and they are described as hydrolyzing and then dissociating, though some bacterial EGs are known to act 'processively' on crystalline cellulose. | Department of Life Sciences, National Chung Hsing University |
| dockerin (docT)   | The dockerin's binding partner is the cohesin domain, located on the scaffoldin protein. It has two in-tandem repeats of a non-EF hand calcium binding motif. Each motif is characterized by a loop-helix structure.                         | Biodiversity Research Center, Academia Sinica (BRCAS)        |
