# Supplementary material for: Immobilization of Recombinant Endoglucanase (CelA) from Clostridium thermocellum on Modified Regenerated Cellulose Membrane
Source: MDPI journal article supplement (doi:10.3390/catal12111356), 2022-11-03
Supplement: s1 [file s1]

Archive with 1 entries (1 files):
- catalysts-1986914-supplementary.pdf
